# Supplementary material
Source: Springer Nature journal article supplement (https://www.springermedizin.de/resource/supplementary/12981_2006_55_MOESM1_ESM.pdf/9603726)

### Rapid Progressor

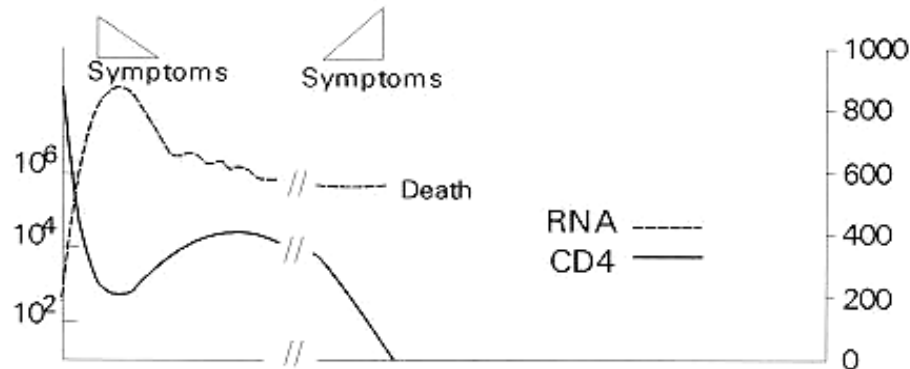

### Intermediate Progressor

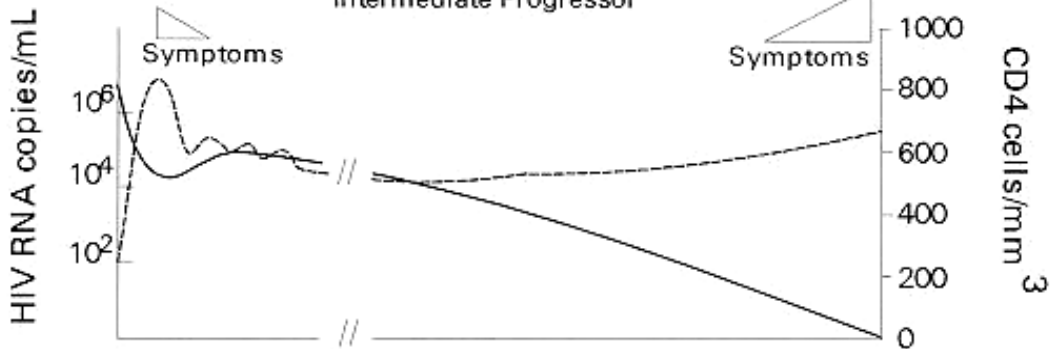

### Late Progressor

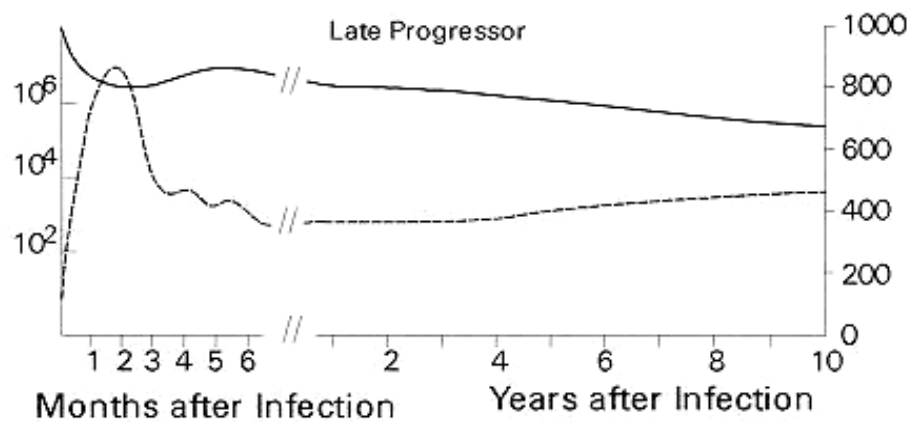

Supplement: MOESM1 [file 9603726]
